# Supplementary material
Source: PubMed Central journal article supplement (PMC2862095)
Supplement: NIHMS194655-supplement-1_si_001.pdf [file NIHMS194655-supplement-1_si_001.pdf]

S. Figure 1. Instrument set up

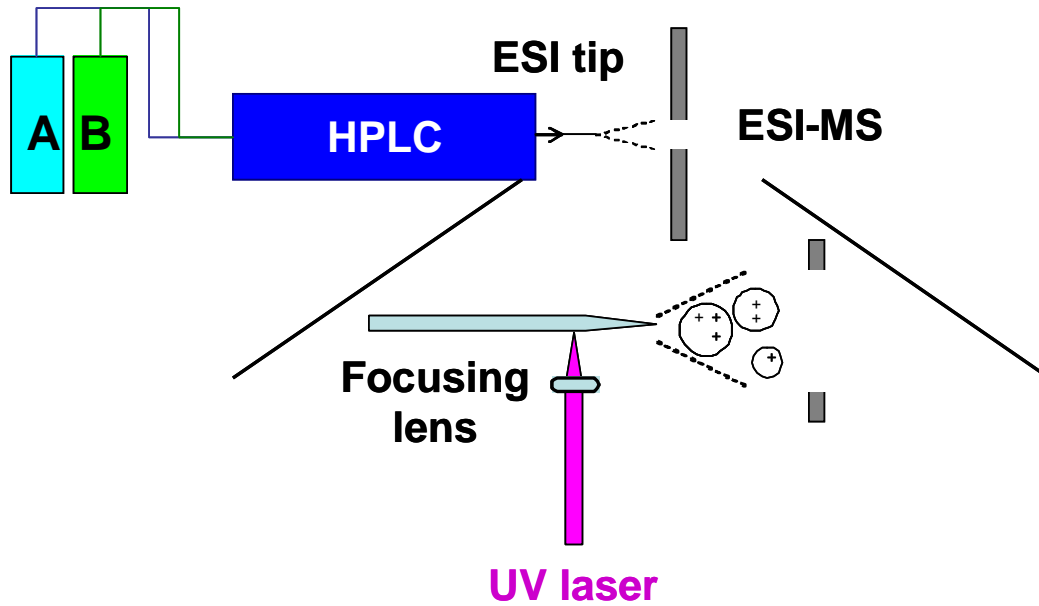

(a) On-line photocleavage with UV laser

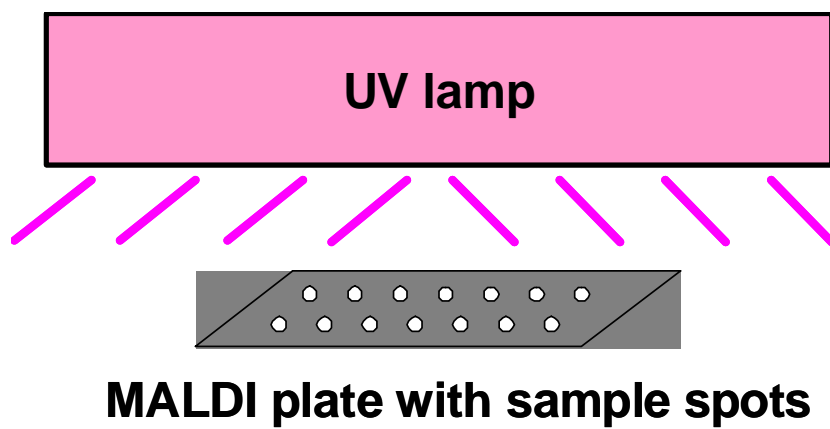

(b) Off-line photocleavage with UV lamp

S. Figure 2. MS/MS spectra of released Angiotensin II (upper) and released Bradykinin (lower) from on-line photocleavage-ESI experiment

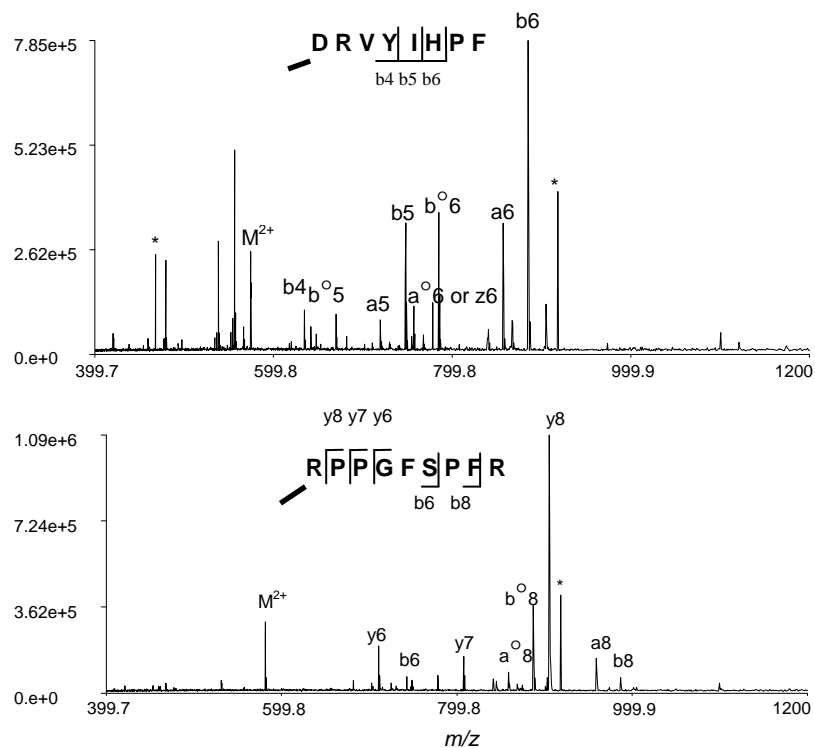

S. Figure 3. Off-line photocleavage of pcPIR cross-linked Angiotensin II (A) and Bradykinin (B).

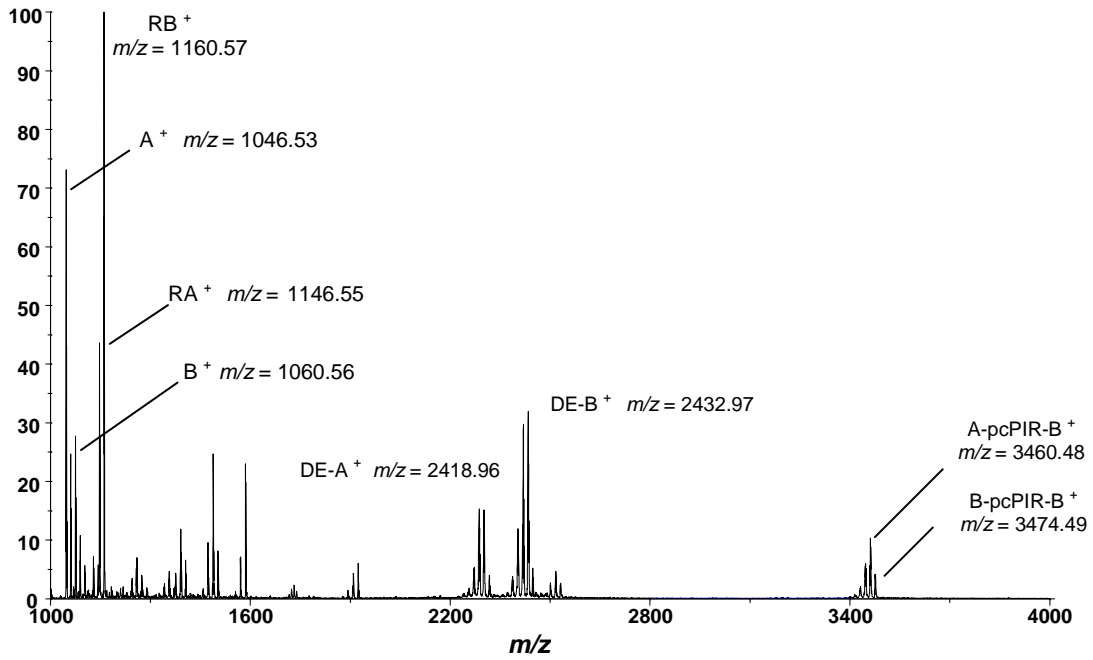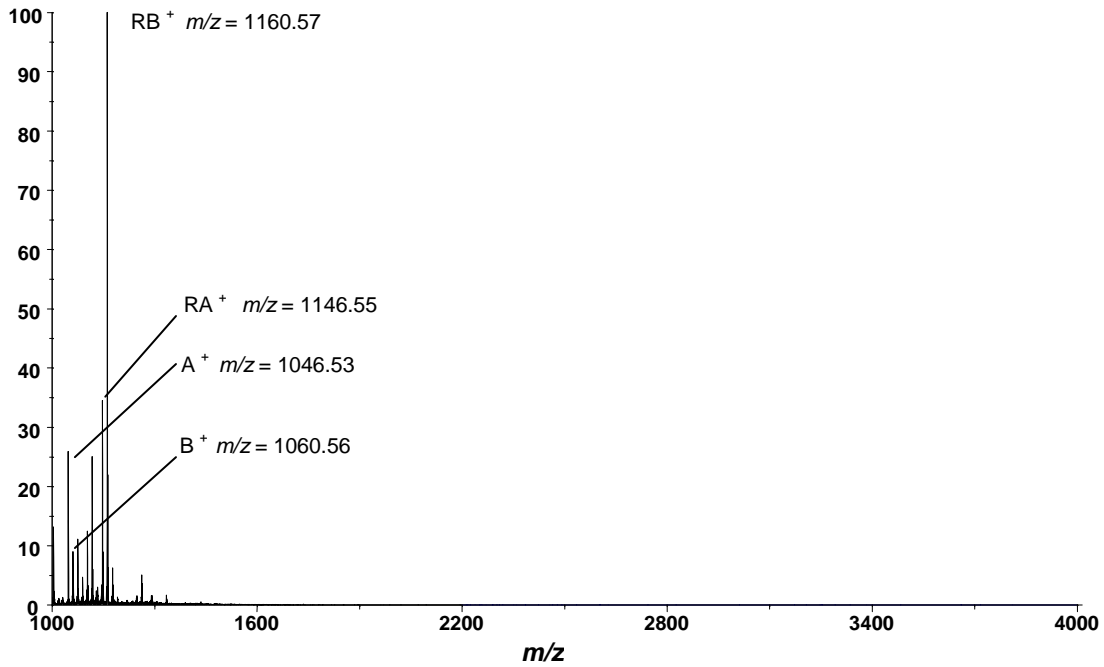

(a) Upper: MS spectrum before UV irradiation; Lower: MS spectrum after UV irradiation.

**MS/MS spectrum of Released Angiotensin II**

Precursor = 1146.5000

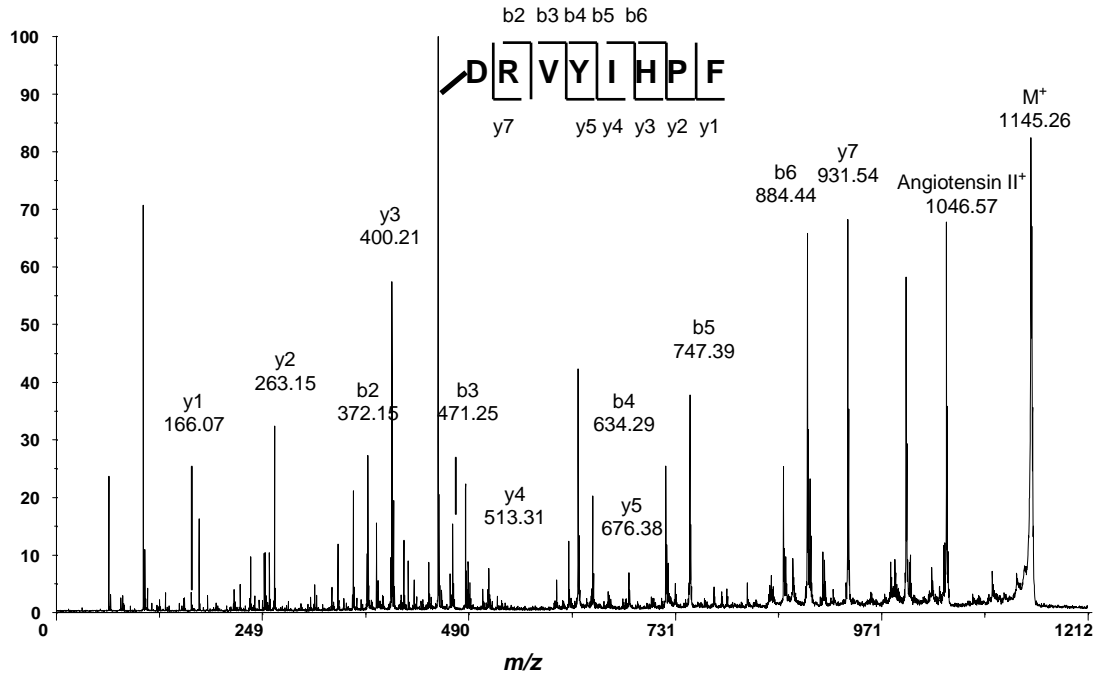

**MS/MS spectrum of Released Bradykinin**

Precursor = 1160.5000

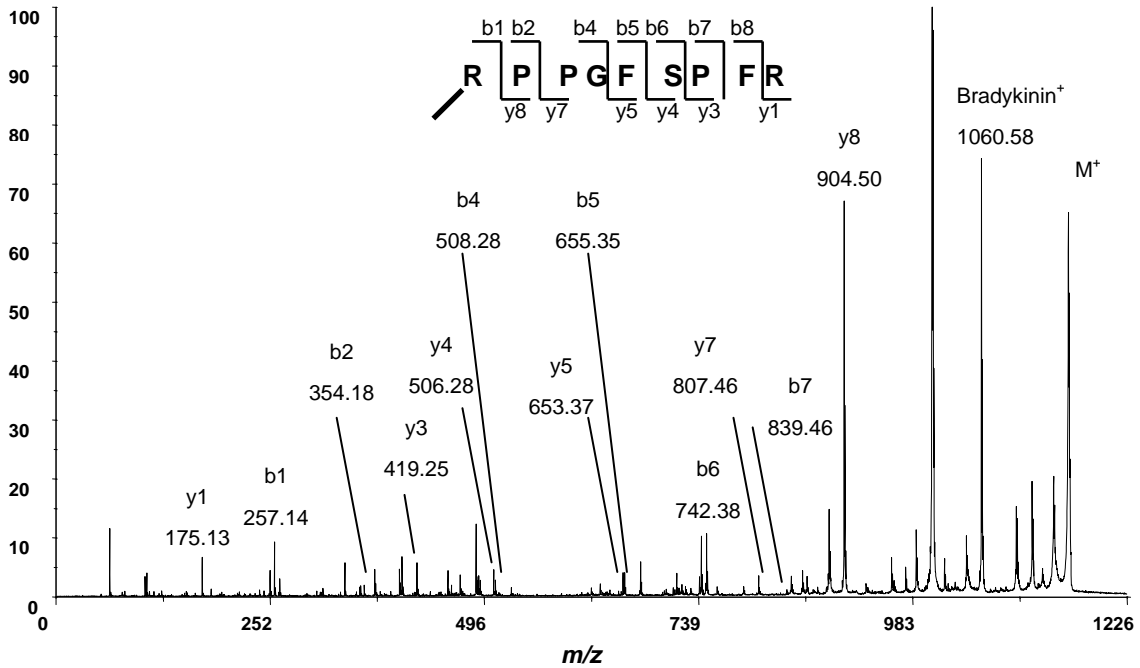

(b) MS/MS spectra of RA and RB from the off-line photocleavage-MALDI experiment

S. Figure 4. Structure of the photocleavable peptide

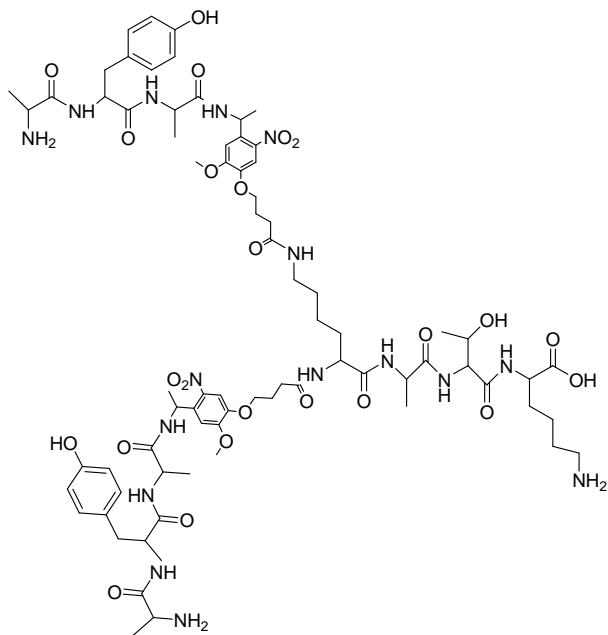

S. Figure 5. Photocleavage efficiency vs. sample flow rate in the ESI spray tip

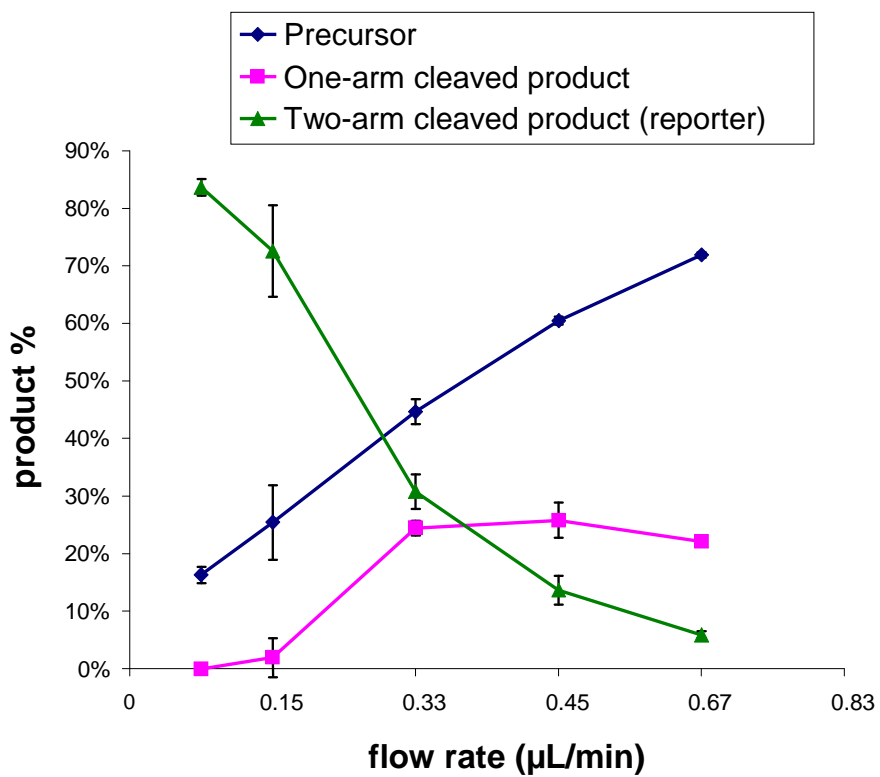

S. Figure 6. Avidin-biotin affinity purification

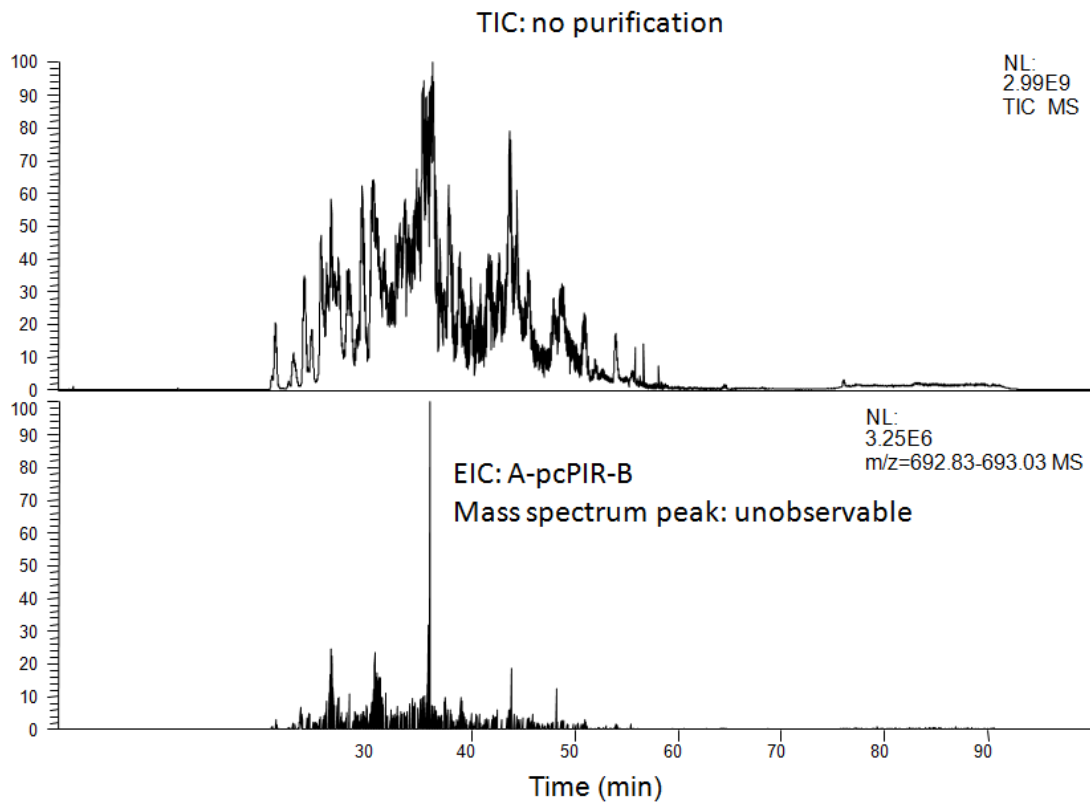

(a) A-pcPIR-B spiked into BSA tryptic digestion, without affinity purification

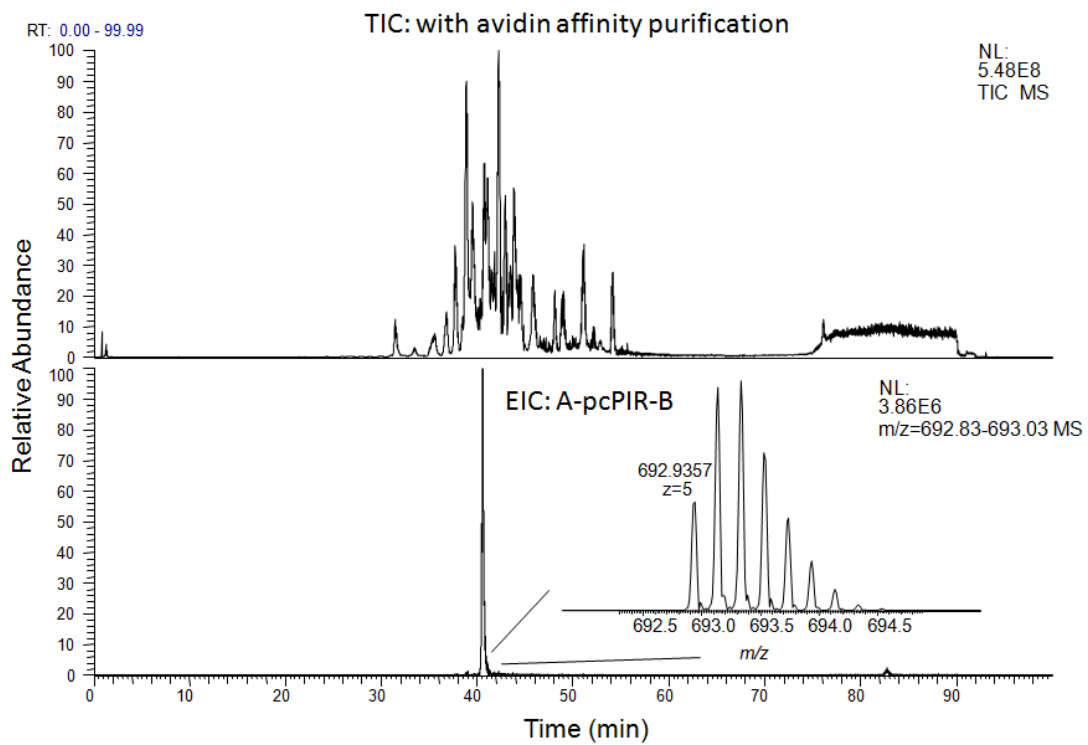

(b) With affinity purification. Inset: MS spectrum of A-pcPIR-B



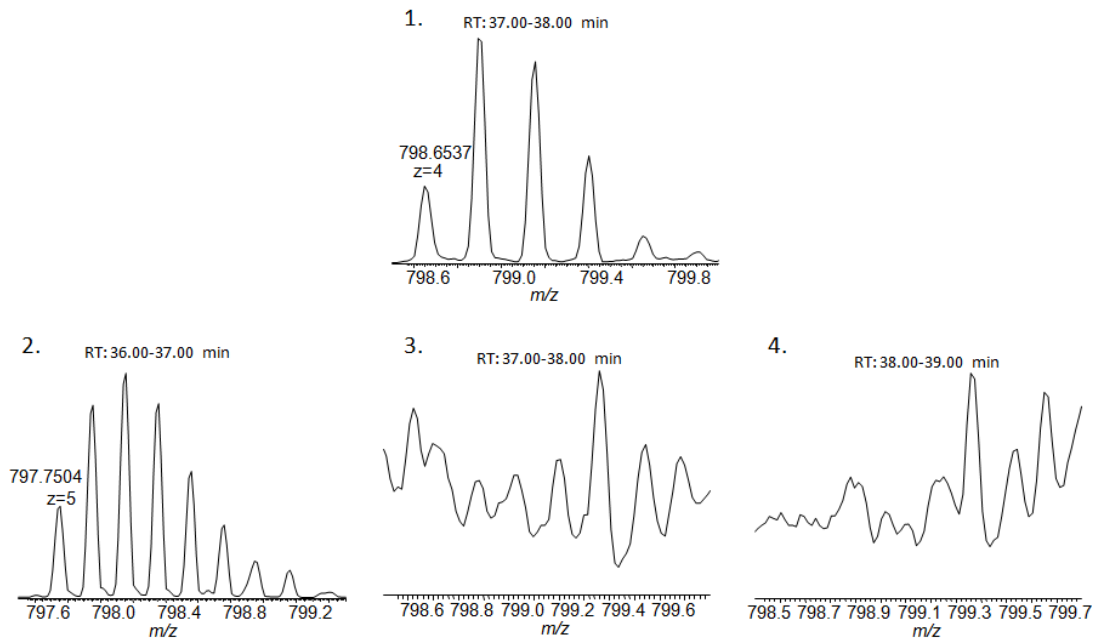

(c) pcPIR cross-linked BSA

c1: inter-cross-linked precursor  $798.65^{4+}$  observed after purification at retention time 37-38 min

c2: from the sample without purification, a similar  $m/z$   $797.75^{5+}$  was observed at retention time 36-37 min, which may suppress the desired product's ion

c3: from the sample without purification, at the same retention time (37-38 min), the inter-cross-link  $798.65^{4+}$  was not observed

c4: from the sample without purification, at retention time 38-39 min, inter-cross-link was not observed

S. Table 1. Mascot identification results of pcPIR cross-linked peptides

| Peptide name   | Observed $m/z$ | Observed mass (Da) | Calculated mass (Da) | Delta mass (Da) | Expect | Peptide sequence |
|----------------|----------------|--------------------|----------------------|-----------------|--------|------------------|
| Angiotensin II | 1146.50        | 1145.49            | 1145.57              | -0.07           | 0.011  | -. DRVYIHPF. -   |
| Bradykinin     | 1160.50        | 1159.49            | 1159.59              | -0.10           | 0.012  | -. RPPGFSPFR. -  |

S. Table 2. Comparison of pcPIR cross-linked BSA dead-end precursor with and without affinity purification

| Component           | $m/z$                | EIC intensity |                | ratio(DE/BSA peptide) |                |
|---------------------|----------------------|---------------|----------------|-----------------------|----------------|
|                     |                      | with avidin   | without avidin | with avidin           | without avidin |
| Dead-end product    | 730.68 <sup>3+</sup> | 3.73 E6       | 1.83 E7        | ~4                    | ~0.07          |
| BSA tryptic peptide | 582.32 <sup>2+</sup> | 9.86 E5       | 2.50 E8        |                       |                |

Avidin affinity purification enrichment factor =  $4/0.07 \approx 60$  fold
